# Supplementary material
Source: publisher figshare collection journal article supplement (https://gsajournals.figshare.com/ndownloader/files/13153055)
Supplement: Supplementary file 1 [file 13153055]

## Sheet: Peak stats
Name	Total # peaks	Total # target RNAs	% peaks with FBE	% peaks with FBE (top 500)	% protein coding	% protein coding (top 500)
SP FBF (25°C)	1991	1704	69	92	98	98
SP FBF-2 (25°C)	2243	1822	69	90	97	97
SP FBF-1 (25°C)	2066	1804	71	87	98	98
OO FBF-2 (20°C)	2150	2028	68	79	90	90
OO FBF (25°C)	1817	1522	70	91	97	97
OO FBF-1 (20°C)	2584	2456	70	86	95	95
OO FBF-2 (25°C)	530	464	84	85	98	98
OO FBF-1 (25°C)	1245	1064	72	87	97	97

## Sheet: Unique read counts
Sample	Number of unique reads mapping uniquely
Control for oo FBF (25°) rep 1	97070
Control for oo FBF (25°) rep 2	200654
Control for oo FBF (25°) rep 3	96060
Control for sp FBF (25°) rep 1	128443
Control for sp FBF (25°) rep 1	65914
Control for sp FBF (25°) rep 1	165013
OO FBF-1 (20°) rep 3	1441932
OO FBF-1 (20°) rep 2	3884231
OO FBF-1 (20°) rep 1	4660214
OO FBF-1 (25°) rep 1	13486
OO FBF-1 (25°) rep 2	681860
OO FBF-1 (25°) rep 3	1698217
SP FBF-1 (25°) rep 1	852744
SP FBF-1 (25°) rep 2	475910
SP FBF-1 (25°) rep 3	1064502
OO FBF-2 (20°) rep 1	2848543
OO FBF-2 (20°) rep 2	401916
OO FBF-2 (20°) rep 3	2216751
OO FBF-2 (25°) rep 1	426458
OO FBF-2 (25°) rep 2	186319
OO FBF-2 (25°) rep 3	354981
SP FBF-2 (25°) rep 1	569792
SP FBF-2 (25°) rep 2	1001336
SP FBF-2 (25°) rep 3	740220
OO FBF (25°) rep 1	439944
OO FBF (25°) rep 2	1036841
OO FBF (25°) rep 3	1884536
SP FBF (25°) rep 1	1477246
SP FBF (25°) rep 2	1592964
SP FBF (25°) rep 3	1634294

## Sheet: Enrich. cutoffs for peaks
Dataset	Enrichment over control reads (absolute number) cutoff (fold)	Enrichment over control reads/million cutoff (fold)
OO FBF-1 (25°)	10	2
OO FBF-2 (25°)	10	2
SP FBF-1 (25°)	10	2
SP FBF-2 (25°)	10	2
OO FBF (25°)	20	2.5
SP FBF (25°)	10	5
OO FBF-1 (20°)	50	20
OO FBF-2 (20°)	20	5
